# Supplementary material
Source: publisher site journal article supplement (https://www.dovepress.com/get_supplementary_file.php?f=494558.docx)
Supplement: Supplementary file 1 [file get_supplementary_file.php]

**Table S1. Comparison of Detection Rates between tNGS and mNGS in Samples**

| Characteristics | PSM cohort | | | | |
| --- | --- | --- | --- | --- | --- |
| mNGS | | tNGS | |  |
|  | Cases(n) | Positive rates (%) | Cases(n) | Positive rates (%) | P value |
| Sputum | 1 | 1 (100.0) | 2 | 2 (100.0) | NA |
| BALF | 143 | 99 (69.2) | 139 | 121 (87.1) | 0.001 |
| Hydrothorax | 4 | 2 (50.0) | 0 | 0 (0.0) | NA |
| Tissue | 1 | 1 (100.0) | 1 | 0 (0.0) | NA |
| Blood | 16 | 13 (81.3) | 4 | 3 (75.0) | 1.000 |
| Total | 165 | 116 (70.3) | 146 | 126(86.3) | 0.001 |

PSM, propensity score matching; mNGS, metagenomic next-generation sequencing; tNGS, targeted next-generation sequencing; PSM, propensity score matching.
